1                    ***Intersecting Vulnerabilities: Unraveling the Complex***  
2                    ***Relationship between Women, Climate Change, and Mental***  
3                    ***Health in Bangladeshi Communities***  
4  
5  
6  
7  
8  
9

10                    Jean-Marc Goudet<sup>1\*</sup>, Faria Binte Arif<sup>2</sup>, Hasan Owais<sup>2</sup>, Helal Uddin Ahmed<sup>3</sup>, Valéry Ridde<sup>1,4</sup>  
11  
12  
13  
14  
15

16                    <sup>1</sup> Ceped, Université Paris Cité, Inserm, IRD, Paris, France  
17

18                    <sup>2</sup> BRAC James P Grant School of Public Health, BRAC University, Dhaka, Bangladesh  
19

20                    <sup>3</sup> National Institute of Mental Health and Hospital, Dhaka, Bangladesh  
21

22                    <sup>4</sup> Institut de Santé et Développement, Université Cheikh Anta Diop, Dakar, Senegal  
23  
24  
25  
26  
27  
28  
29  
30  
31  
32  
33

34                    \* Corresponding author  
35

36                    E-mail: [jeanmarcgoudet@gmail.com](mailto:jeanmarcgoudet@gmail.com) (JMG)

## 1 Abstract

2  
3 Climate change is one of the biggest challenges that humanity is facing in the 21st  
4 century, and its impact is being felt all over the world. It is well documented that the impacts  
5 of climate change have a significant effect on human health, including mental health. This  
6 paper focuses on the gender effect of climate impacts on mental health based on qualitative  
7 study conducted in two fragile communities in Bangladesh. This study was conducted using  
8 qualitative methods, including participant observation, in-depth interviews, and focus group  
9 discussions. The study was carried out in two fragile communities in Bangladesh, which were  
10 selected based on their vulnerability to climate change impacts. The participants were selected  
11 using snowball sampling. A total of 59 interviews and 3 Focus Group Discussions (FGDs)  
12 were conducted. Climate change impacts have a significant effect on mental health in both  
13 men and women. However, there are gender differences in the experience of climate change  
14 impacts on mental health. Women are more vulnerable to climate change impacts on mental  
15 health due to their gender roles and responsibilities. Responsible for taking care of their  
16 families, they have to face additional challenges due to climate change impacts, such as  
17 increased workload, water scarcity, and food insecurity, social insecurity as many of their  
18 husband migrates to the cities for jobs. Women also face social and cultural barriers, which  
19 exacerbates their vulnerability to climate change impacts on mental health. Men, on the other  
20 hand, face challenges related to their livelihoods and economic security due to climate change  
21 impacts. This study highlights the gender differences in the experience of climate change  
22 impacts on mental health in two fragile communities in Bangladesh. Socioeconomic and  
23 environmental determinants appear to be embedded and lead to psychological suffering in  
24 relation to social roles and gender norms. Interventions should be designed to address the  
25 specific needs and challenges faced by women in these communities. Policymakers should  
26 take a gender-sensitive approach to address the mental health impacts of climate change in  
27 these communities. This study contributes to the growing body of research on the gendered  
28 impacts of climate change with a trajectory approach and provides insights for future research  
29 in this area.

## 30 31 32 Introduction

33  
34 Since the end of the 2000s, climate change (CC) effects on mental health are described  
35 as a global emergency. Berry et al., described two main causal pathways between mental  
36 health outcomes and climate impacts [1]. Direct consequences occur after acute events and  
37 are described in terms of depression or psychological trauma [2]. Indirect consequences could  
38 be caused by the changes in ecosystems through different determinants such as economy,  
39 migration, or social structures [2]. For example, long-term changes such as chronic drought  
40 increased the distress of the rural population [3]. Additionally, the cumulative effects of  
41 multiple stressors associated with climate change can intensify existing mental health issues  
42 or lead to the emergence of new ones. Such stressors may include food and water  
43 insecurity[4–6], loss of livelihoods [7], displacement [8], and social networks [9]. Yet, a  
44 knowledge gap remains to characterize the chronic effects of slow-onset events on mental  
45 health issues [10]. Siegele defines the slow-onset events as phenomena with chronic changes  
46 (increasing temperature, sea-level rise, salinization, ocean acidification, loss of biodiversity,  
47 etc.) as opposed to acute events (storms, floods, acute drought, etc.) who are not permanent  
48 and occurred in a short time frame [11]. As the slow-onsets and their chronic consequences  
49 will keep rising, it is important to better understand the underlying mechanisms to provide

50 adequate actions. Moreover, the slow onset events are disproportionately affecting the  
51 population living in the global South as they are more dependent on natural resources such as  
52 water and crops. While women are considered at higher risk to suffer from post-traumatic  
53 stress disorder after any natural disaster [12], how climate changes affect their mental health  
54 remain underexplored in global South. Recent result show how climate change, and  
55 specifically extreme weather events do affect the social structure. Women's vulnerabilities are  
56 shaped by cultural and gender norms, as well as their lower socio-economic status in society,  
57 which manifests itself in their domestic role, decision-making within the household, and it is  
58 accentuated during climatic events [13] and in the context of a changing climate [14]. Indeed,  
59 these events prompt men to leave their communities in search of income, while women are  
60 trapped behind to shoulder caregiving responsibilities and additional duties [15]. But the  
61 underlying mechanisms of action are not well-explained. Moreover, there is limited data  
62 available from countries in the Global South, which are often the most vulnerable to the  
63 impacts of climate change.

64 Bangladesh is one of the countries most exposed to climate events (cyclones, tidal surges,  
65 floods, periods of drought) [16], and over the past decade, acute events have become  
66 increasingly frequent and intense due to climate change [17]. Simultaneously, the nation faces  
67 slow-onset events (acidification, increasing temperature, salinization, loss of biodiversity,  
68 etc.) that have led to environmental disruptions [18,19]. More than 60% of the population  
69 lives in rural areas and is significantly affected by slow-onset events [20]. The country is now  
70 confronting a dual crisis with the emergence of a mental health crisis. Recent studies highlight  
71 the substantial mental health burden in Bangladesh, with a 2019 average prevalence of mental  
72 disorders in the population reaching 16.8% [21]. A 2020 study published showed that 20 % of  
73 rural women were screened for a major depression disorder [22]. However, mental health  
74 infrastructure is limited, and very few psychiatrists are available in the country, with an  
75 estimated 260 psychiatrists for the 162 million people living in the area [23]. Moreover,  
76 research in the mental health field is underfunded and women's mental health has been  
77 identified as one of the scientific priorities [24].

78 Our objective is to understand how mental health's women are disproportionately affected by  
79 climate change in the context of vulnerable communities in the global South.

80  
81

## 82 **Methodology**

83  
84

85 We conducted a qualitative research including participant observation, in-depth  
86 interviews, and focus group discussions [25].

87 This study is nested within the Clim-HB project, a large public health research that focuses  
88 on health system resilience and climate change [26]. Our research took place in two  
89 vulnerable communities in Bangladesh, one in a rural area and the other in an urban area  
90 chosen due to their vulnerability and exposure to climate change.

91 In the rural community, the local population relies on agriculture and aquaculture (fish and  
92 shrimp culture) for their livelihoods. This community, located in the southwest region of the  
93 country, is subject to both slow-onset and acute climatic events. Moreover, 20% of the  
94 population experience a seasonal migration after the monsoon due to the lack of employment.  
95 The second setting is a slum in the capital city. The investigation primarily focused on the

96 poorest households in the slum, who live in stilt houses built over a canal. This setting is  
 97 particularly exposed to pollution and high temperatures. These field sites are part of a larger  
 98 public health research project within the framework of the Clim HB project [26]. Both  
 99 populations share a pattern of migration, as a large portion of the families encountered in the  
 100 slum originated from coastal regions of Bangladesh and migrated for economic reasons, and  
 101 sometimes environmental ones. Coastal regions are subject to significant environmental  
 102 transformations as well as a scarcity of jobs, which is also related to the urbanization of the  
 103 country [18,20].

104 The communities were selected using purposive sampling, and the participants were selected  
 105 using snowball sampling. To reflect the seasonal variations that could influence mental health  
 106 issues, data were collected during two period covering three months in total: in March and  
 107 April during the hot season and in October 2022 after the monsoon. In each site,  
 108 approximately fifteen households were followed throughout both data collection periods. We  
 109 conducted interviews with various household members to triangulate the data, which helped  
 110 improve the reliability and quality of the information gathered. This method proved to be  
 111 essential in establishing the research relationship, allowing us to reconstruct social trajectories  
 112 and assess the impact of specific environmental events on women's mental health. Table 1  
 113 shows that the study comprised a total of 55 interviews and 6 focus group discussion (FGD).  
 114 Only relevant data for the research question were retained for the analysis.

115 **Table 1. Number of interviews and FGDs by site and season of study, Bangladesh, 2022.**

|                                    | <b>Rural area</b>                                                                                                                                                                                                                                                               | <b>Urban (slum)</b>                                                                                                                                                                                                     |
|------------------------------------|---------------------------------------------------------------------------------------------------------------------------------------------------------------------------------------------------------------------------------------------------------------------------------|-------------------------------------------------------------------------------------------------------------------------------------------------------------------------------------------------------------------------|
| <b>Hot season 2022</b>             | <p><b>12 In-depth interviews</b></p> <ul style="list-style-type: none"> <li>• 7 mothers</li> <li>• 2 fathers</li> <li>• 1 teenage girl</li> <li>• 1 teenage boy</li> <li>• 1 professional : traditional healer</li> </ul> <p><b>3 FGD</b> (teenager-girls, adults, farmers)</p> | <p><b>14 In-depth interviews</b></p> <ul style="list-style-type: none"> <li>• 8 mothers</li> <li>• 1 father</li> <li>• 2 teenage girls</li> <li>• 2 community clinics' professionals</li> <li>• 1 pharmacist</li> </ul> |
|                                    | Informal conversation and notes taken during the ID, FGD (observation and translated sentences) and informal moments (over 150 pages of notes)                                                                                                                                  |                                                                                                                                                                                                                         |
| <b>After moonson 2022 (autumn)</b> | <p><b>13 In-depth interviews</b></p> <ul style="list-style-type: none"> <li>• 5 mothers</li> <li>• 3 fathers</li> <li>• 1 teenage girl</li> <li>• 2 teenage boys</li> <li>• 1 paramedic</li> <li>• 1 medical doctor</li> </ul> <p><b>2 FGD</b> (children &amp; male adults)</p> | <p><b>16 In-depth interviews</b></p> <ul style="list-style-type: none"> <li>• 3 community leaders</li> <li>• 11 mothers</li> <li>• 2 fathers</li> </ul> <p><b>1 FGD</b> with male local leaders</p>                     |

|  |                                                                                                                                                |
|--|------------------------------------------------------------------------------------------------------------------------------------------------|
|  | Informal conversation and notes taken during the ID, FGD (observation and translated sentences) and informal moments (over 100 pages of notes) |
|--|------------------------------------------------------------------------------------------------------------------------------------------------|

116

117 The majority of the interviews were conducted in Bengali with the presence of a Bengali-  
118 English translator. During the second fieldwork, the researchers returned to the same  
119 individuals to conduct a follow-up and refine the data obtained from the first fieldwork. In  
120 each site, around fifteen families were interviewed. When possible, researchers conducted  
121 interviews with different household members, to triangulate and gain a comprehensive  
122 understanding of the family's situation.

123 A thematic analysis was then performed based on the social determinants framework from  
124 WHO and Lund et al. [27,28]. To understand how power relations among gender are  
125 constituted in a changing climate, it was combined to specific dimension (access to resources /  
126 division of labour within and beyond the household) from the gender framework [29].  
127 The authors had access to non-anonymized individual participant data, but it is important to  
128 note that the data presented in this study have undergone a rigorous anonymization process  
129 and have been maintained with strict confidentiality.

130

## 131 **Ethics declarations**

132

133 All participants provided signed consent to participate. Written consent was obtained from  
134 both the parents and the individuals themselves for participants under the age of 18, ensuring  
135 that both parties were informed and gave their consent to take part of this study. The study  
136 protocol was reviewed and approved by the ethics committee from the Institutional Review  
137 Board (IRB) of the BRAC James P Grant School of Public Health, BRAC University (ref:  
138 IRB □ 19 November'20–050) in Bangladesh.

139

140

## 141 **Results**

142

143

144 Two main pathways of mental health outcomes impacted by climate change through  
145 gender have been identified in these vulnerable communities. These pathways are  
146 interconnected, depending on the social and environmental situation, and they often manifest  
147 as cumulative effects that shape women's trajectories.

148

149

### 150 **The socioeconomic stressor as an intermediate factor**

151

152 This first pathway contributes to exacerbating pre-existing gender inequalities arising from  
153 economic determinants. It leads to anxiety and depressive-like disorders by amplifying  
154 individual vulnerabilities through the impact on livelihood.

155

### 156 **Impacts on mother responsibilities**

157

158 Climate change directly impacts the livelihoods of the most vulnerable populations.  
159 Due to drought, peoples from rural setting are experiencing a decline in agricultural

160 production and shrimp yield. The immediate effect on market prices leads to food insecurity  
161 that challenge mothers' responsibilities. It results in increased anxiety for them and potential  
162 adverse effects on the physical health of their children. This affects all families in the studied  
163 village, including those with a higher socio-economic status.

164

165 *I: There are some problems. Suppose we can now buy 1.5 kg when we could buy 2kg*  
166 *in the past. It has become like this due to the price hike.*

167 *R: Any problems to feed for the children?*

168 *I: Even if we are starving, we have to feed them. We have to meet their need. (mother*  
169 *1)*

170

171 This suffering is amplified in households that are already in economic difficulty with debt.

172

173 *I: You explained this year it did not rain much and it rained heavily for only 2 or 3*  
174 *days. Do you think you have faced any problems with the lack of rainfall?*

175

176 *R: We have faced some problems with the lack of rainfall such as we had to irrigate*  
177 *our land manually, and we have faced problems regarding jute retting. (...) We also*  
178 *had problems with the money lender. So, we had to take money from our relatives as*  
179 *well. It was very stressful (mother 2)*

180

181 Those that are in-debt experience the situation as one of the most difficult in their lives.  
182 The situation seems worse for them due to a reduced ability to implement coping strategies.  
183 Indeed, the mother 1, whose husband belongs to a higher social class and has attempted to  
184 engage in local politics, holds significant social and symbolic capital in the village. The  
185 family has better economic resources and greater diversification. They own a pond with fish,  
186 a small vegetable garden, and a chicken coop. In the opposite, mother 2 and her husband have  
187 a small land and a little grocery store that experienced the COVID crisis, and they both come  
188 from impoverished families. Furthermore, mother 2 has two young children, one of whom she  
189 is breastfeeding. When asked about her sleep quality, she expresses difficulties related to her  
190 child's crying, who is not adequately nourished.

191

192 *I: The child annoys me a lot. I can't breastfeed her properly (...)*

193 *R: No, I could not sleep previously because of the financial crisis and now I cannot*  
194 *sleep properly because my child cries at night.*

195 *I: Do you wake up a lot during the night?*

196 *R: He wakes up 2 or 3 times at night.(...) He does not like to eat rice. He always asks*  
197 *for good food like fish, and eggs. (mother 3)*

198

199 Thus, the effects of climate change tend to follow the socio-economic gradient and the  
200 preexistent social inequities. For mother 2, who belongs to a lower class and is heavily in  
201 debt, food insecurity leads to disruptions in breastfeeding and undermines her mental health  
202 as a caregiver. On the other hand, for mother 1, the psychological distress is less severe due to  
203 her financial capacity to cope with the situation. Due to hampering in the breastfeeding leads  
204 the nutrients lacking in her child also. The impacts are continuing in the cyclic pattern.

205

206 In each instance, these situations were described by the women who bear the responsibility of  
207 caring for and feeding the children, while the interviewed men explained their strategies for  
208 obtaining income without ever mentioning the mothers' and children's circumstances. This  
209 indicates the overlooking tendencies of the women's burden also be discussable.

210  
211  
212  
213  
214  
215  
216  
217  
218  
219  
220  
221  
222  
223  
224  
225  
226  
227  
228  
229  
230  
231  
232  
233  
234  
235  
236  
237  
238  
239  
240  
241  
242  
243  
244  
245  
246  
247  
248  
249  
250  
251  
252  
253  
254  
255  
256  
257  
258

Similarly, their economic dependence on their husbands sometimes prevents them from leaving their marriage when they consider them unfit to fulfill their roles.

*R: But after marriage, my husband once left his job and started pulling a rickshaw. He used to pull the rickshaw one day and sit at home for three days without earning any money. At that time, I got a feeling of leaving this family and staying separate from my husband. But I couldn't do that because of my children. I was worried for them. (mother3)*

Income-generating activities in rural areas are not very popular. Due to their limited social capital and reduced agency, women often cannot leave their husbands to seek economic security for their children unless they can receive support from other family members, such as their own parents.

### **Coping strategies on the household rely on the daughters' & mothers' sacrifices**

Coping strategies for the economic situations are dependent on social roles within families and based on a division of labor. Both are exacerbated in a changing climate. Mothers, who are often housewives to raise and educate the children, bear the responsibility of caregiving and thus have fewer options for economic survival strategies. This specifically impacts their mental health.

One of the economic survival strategies presented by a mother from the slum involved not bringing all her children with her. She took the youngest child who was breastfeeding and needed her, while she left her eldest daughter with her mother-in-law. She tries to visit her daughter every three months but describes this situation as very painful for her.

*I: How is your sleep now? Are you tensed about something?*

*R: I am bound to be tensed about my son or my daughter. I can't do any work.*

*I: If you could tell us what are your thought about your children?*

*R: The mother has to suffer the pain of the son. Will anyone else suffer?*

*I: Can you sleep properly or you wake up from the sleep early?*

*R: I do wake up suddenly. I think what I did to deserve this. (mother 4)*

She didn't want to move to the slum but had to as her husband has job there. They are both from the coastal area where it became hard to survive. Economic migration was thought as a survival strategy decided by the husband.

Furthermore, this economic migration desired by her husband isolates her. Being far from her mother and sister, makes it even more difficult for her to cope with the situation. Besides, her inability to work as she has to take care of her son reinforce her feeling of isolation.

*R: I have to think about the rent, food and everything. But in village, i can share everything with my mother and my sister, which is very much better than this. (mother 4)*

259 Additionally, she explains that she had to accept being married to financially relieve her  
260 parents and could not pursue her studies.

261

262 *R: I have five siblings and I am the eldest among the sisters. I studied till class 6 and*  
263 *then my parents married me off to reduce the burden (...). (mother 4)*

264

265 Economic strategies for these poor rural families are mainly decided by men so they can  
266 provide for their families, even though this becomes increasingly complicated during times of  
267 economic and environmental crisis.

268

269 In some cases, environmental events shape the economic strategies of the families.

270

271 Another respondent explained, that after an environmental event, her father decided to  
272 married her.

273

274 *R: When I was a child, I observed a lot of cyclones and storms.*

275

276 *I: Did your house suffer damage during those cyclones?*  
277 *R: We had 2 houses, one of the fell apart because of the Cyclone. It happened before*  
278 *the river erosion. And we lost everything including houses in the river erosion.*

279

280 *I: When did this river erosion happen?*  
281 *R: It happened around the mid-2000's. Before my marriage.*

282

283 *I: Did you got married for this reason or there were other problems in your family?*  
284 *R: Before the river erosion, my family had the land and we were financially strong but*  
285 *after the incident we got poor. And since we were so many siblings my father took the*  
286 *decision about my marriage.*

287

288 *I: What type of land were those?*

289

290 *R: They were agricultural land and we used to grow rice and other crops on them.*

291

292 *I: Can you tell me the size of those lands?*

293

294 *R: It was a good amount of land. The whole area was gone by river erosion. (mother*  
295 *5)*

296

297 In this case, the environmental event leads to a descendant social mobility of the family. Now  
298 living in the slum, this mother face economic constrained that generate anxiety. She is  
299 concerned about her children education and a broader vision of their future.

300

301 *R: It will be much more reliable for us to survive if my husband gets a new job. We*  
302 *pay 4,000 takas as rent for one room and, my husband and my children live with me in*  
303 *that one room.*

304

305 *I: Can you tell me about your food expenses?*

306

307 *R: Every month it costs about 10,000 to 12,000 taka for our food and children's*  
308 *education combined. The house rent is separate. (...)*

309

310 *R: I'm having some stress about the future of my children and, also since my husband*  
311 *has no job, I'm concerned about how we will finance the upcoming days. I'm having*  
312 *headaches because of this stress. (mother 5)*

313

314

315 **Gender violence**

316

317



308 Although these situations have been documented outside the context of climate crises  
309 [30], they appear to be more intense and recurrent when crises affect the household's  
310 livelihood and reduce the opportunities for men to generate sufficient income to meet the  
311 family's needs.

312  
313 For example, the previous woman who was married after a river erosion and came in the slum  
314 faced domestic violence because of the unemployed situation of her husband and his  
315 addiction.

316  
317 *R: I feel stressed now, but the reason is different. My husband has no work and he is*  
318 *addicted, because of that we have conflicts in the house and also many other domestic*  
319 *problems, that's why I have stress and tension all the time. (...) As he used to spend the*  
320 *money on drugs and I tried to convince him, for that reason he used to beat me. (mother 5)*  
321

322 Like other respondents, she is particularly isolated, which increases her stress. Her mother-in-  
323 law is her close neighbor, support her son, and would report to him any of her complaints.  
324 This exacerbates the situation and further contributes to the respondent's stress and feelings of  
325 isolation.

326  
327 *R: I'm trying to convince my mother-in-law as well, but every time they say that he will*  
328 *quit his addiction soon but it's not happening and these types of conversations are*  
329 *making conflicts between my husband and his mother and also me. because I'm*  
330 *informing my mother-in-law about my husband's addiction and somehow, he is also*  
331 *getting to know that I informed his mother. That's why there are conflicts between us*  
332 *also. (mother 5)*  
333

334  
335 Several women explained to us that when they discuss household money management with  
336 their husbands, particularly in situations of debt, the husbands reprimand them and may  
337 physically abuse them.

338  
339 *R: I used to have arguments with him, regarding the bazaar he used to take money*  
340 *from people, and if I ask questions about it then he was beating me.*

341 *I: He is an alcoholic?*

342 *R: No. He used to gossip with his friends and spent money, this is his habit, but our*  
343 *house condition is not good. That's the reason*

344 *I: When you used to say something that time he used to beat?*

345 *R: I said that, we have children, and they can't live without eating, he didn't do the*  
346 *bazaar properly.*

347 *I: He used to take loans?*

348 *R: Yes.*

349 *I: He used to take loans from people but he didn't go to work, if I ask anything then he*  
350 *used to beat me. (mother 6)*  
351

352 In the rural area, a family facing over-indebtedness also experienced the negative effects of  
353 climate change on their mental health. The woman explained that their financial situation was  
354 already poor before, but it worsened this year due to a lack of rain. The combination of  
355 financial stress and the impacts of climate change can create a challenging situation for  
356 families, particularly for women, mothers, and widows who bear the responsibility of  
357 caregiving.

358  
359  
360  
361  
362  
363  
364  
365  
366  
367  
368  
369  
370  
371  
372  
373  
374  
375  
376  
377  
378  
379  
380  
381  
382  
383  
384  
385  
386  
387  
388  
389  
390  
391  
392  
393  
394  
395  
396  
397  
398  
399  
400  
401  
402  
403  
404  
405  
406  
407

*R: We also had problems with the money lender. So, we had to take money from our relatives as well. It was very stressful.*  
*I: Do you sleep well at night?*  
*R: No, I could not sleep previously because of the financial crisis and now I cannot sleep properly because my child cries at night. (...)*  
*I: How is your relationship with your husband?*  
*R: The relationship is good but we get into fights for financial matters. People come over to ask for money and get into fights over it.*  
*I: Does he physically abuse you along with verbal abuse?*  
*R: He hits me at times.*  
*Hasan: When was the last time he hit you?*  
*R: It starts with an argument. I try to stay patient. People tend to pass judgment as I live in my father's house. People will talk, that is why I need to remain patient.*  
(mother 7)

This inescapable situation, which is often the result of norms and social pressures placed on women regarding the importance of religious marriage, can significantly impact their mental health and well-being. Women may feel trapped in their circumstances, unable to leave their marriages or seek help due to the expectations and obligations associated with their roles as wives, mothers, and caregivers.

*R: Because my elder brother is very angry, if he listened to that, my husband is shouting at me or if he is misbehaving with me, then he will beat him. That's why I don't.*  
*I: He doesn't know that he used to beat you?*  
*R: Yes, he knows, he tried to get him arrested several times.*  
*I: Okay.*  
*R: But he couldn't do it because of me. I said how many times people get married, once so let it be, let me stay with one person. (mother 7)*

### **Lack of coping strategy**

The isolation experienced by many mothers and young girls is reinforced by the social norms that disregard discussions about psychological issues. This is a mechanism that is both self-controlled and encouraged by men due to the significance of reputation within these communities. Reputation is not only important for marrying off their children but also for matters of social dignity.

*R: I always think if I'm able to do this then, it will be better but I don't have money, so how I'll do it? My children wanted to live in a good place and to have good food, but I am unable to do anything. No one will help me, I didn't share with anyone, my son asked me not to share because people will judge us, I am sharing with you guys as you're listening otherwise, I don't share with anyone, my son is different, he doesn't share his sadness with anyone. He has grown up. So, he doesn't like this. (mother 8)*

### **Climate events as a triggering factor**

408

409

410

The second mechanism highlighted by our data concerns the triggering effect of climate events, that affects young girls and mothers.

412

413

We had already encountered this issue with environmental event during our fieldwork in April 2022 following the COVID-19 pandemic. Some women had mentioned having suicidal thoughts during that period due to their perceived failure in fulfilling their caregiving responsibilities for their children.

416

417

418

*R: During the covid situation, I and my two children were staying with my husband.*

419

*Whenever our children asked for food, we were not able to provide them with food.*

420

*That time I had a feeling of committing suicide.*

421

*I: Have you ever tried to commit suicide?*

422

*R: Yes, I tried to commit suicide once in the middle of the Corona situation. But with the poison bottle in my hand, I couldn't commit suicide anymore when I thought about my children because I was worried about who'll look after my children after I will be gone. (mother 9)*

424

425

426

427

428

## **Hot weather and children behavior**

429

430

431

During our first field in the hot season, indoor temperatures in the tin houses of the slum were very high and significantly higher than outdoor temperatures. Several women reported children's sleep problems resulting into behavioral issues during the day. They explained that they could not control their children's behavior, which led them into a negative spiral of increasing anxiety and stress, due to sleep deprivation, compounded by the children's difficult-to-regulate behavior.

437

438

439

## **Environmental & specific setting**

440

441

442

The specificities of climate events are important to consider for the policy maker and in order to help the most vulnerable people. Usually the main characteristics retained are the duration, frequency, intensity of an event, geographical location such as coastal areas [31].

445

446

During our study, the cyclone Sitrang occurred and was considered by local authorities as having caused much damage due to its low intensity. However, the topography of the part of the slum involved in our study, whose houses are located on a canal, were highly affected. For the respondent, this cyclone that occurred in October 2022 was much more difficult than one of the last cyclones recognized as having caused the most damage in Bangladesh (Amphan in 2020), even if she was at this time living in the coastal area. Indeed, here she did not receive any assistance or rescue and was trapped in her room, although she took refuges during Amphan.

454

455

*R: I think this cyclone was more dangerous. I stayed here the whole night. Yes, it was more dangerous for me (...) there we suffered from damage, one of our big trees was*

456

457 *fallen into our house, our house was broken because of that, later we were unable to*  
458 *fix it, the government helped us, and send some dry food. (mother 10)*

459  
460 The inability to access shelters for these impoverished families has made them more  
461 vulnerable, even though they have migrated from coastal areas that have been hit by multiple  
462 cyclones, but where a refuge had been accessible.

463  
464

## 465 **Housing vulnerability in the face of climate events**

466  
467

468 This importance of housing was highlighted during the Cyclone Sitrang which  
469 occurred in October 2022 and caused significant damage to families living in the slum.  
470 Some of our respondents described the alarming situation for living in the tin houses located  
471 on the part of the slum built on stilts above a canal. During the cyclone, the rainwater arrived  
472 both from clouds and canal, whose water level began to rise suddenly in the evening.  
473 While the majority of family took refuge in a public building, this one found trapped in her  
474 room.

475

476 *R: During the cyclone, our house got flooded. The water level was very high because*  
477 *our house was one of the low-level houses in this area. We lost many small household*  
478 *things such as dishes and other belongings during that flood. The water level rose and*  
479 *flooded our house at 11 pm night. The rain started early in the morning. We were*  
480 *sleeping in the house when the water got into our house. We didn't expect that the*  
481 *water level would rise that much because previously when it rained very little amount*  
482 *of water used got into our house but that night the water level was very high. (mother*  
483 *11).*

484

485 The situation was catastrophic as the family faced the prospect of death. While the mother  
486 recounts the extreme tension, her children were traumatized, and her daughter remains in  
487 shock several days after the event.

488

489 *R: When we were standing in bed, I was very tense. We were afraid that if the rain*  
490 *continued, the water will increase, and we will be stuck here and die. One person*  
491 *came during that time and he was asking if someone was stuck here in these houses.*  
492 *We shouted yes and said that we were there. But I don't know whether he listened to us*  
493 *or not because he didn't respond. Also, there were so many mosquitoes biting us*  
494 *continuously, so we also asked that guy if he could bring us a mosquito coil. But he*  
495 *didn't respond. And no one came to rescue us later on.*

496

497 *I: How were the babies doing during that time?*  
498 *R: We removed the sewing machine from the table and placed the table on the bed.*  
499 *Then we kept our children on top of that table. They sat there the whole night. My*  
500 *daughter cried the whole night because she was very afraid of seeing the water. She is*  
501 *still sick. My son also got sick and was afraid, so I took him to maulana (the religious*  
502 *leader of the community), and now he's feeling good. But my daughter is still afraid*  
503 *and sick. (mother 11)*

504

505 Housing is one of the most important factors in resilience or vulnerability to climate events  
506 (heat waves, floods or cyclones). In both rural and urban sites, the houses that were less  
exposed to flooding and more resilient to extreme weather conditions offered greater security

507 and protected mental health outcomes. Here too, gender plays a significant role in the  
508 inheritance that is passed down to children, reflecting an inequality in the distribution of  
509 material resources. The previous respondent, who is abused by her husband, lives in a tin  
510 house, while her brother, who wants to help her, resides in their parents' hard-building house.  
511 She is thus doubly vulnerable as she does not live in durable housing and she does not move  
512 because her husband is not a decent enough person for him to live with his family.

513

514 *I: Why don't you stay there?*

515 *R: I don't stay there as my husband is not good. Maybe he can say a bad word, they*  
516 *can hear that. It's not good to stay with the relative (mother 11)*

517

518

### 519 **A single mother with mental health preconditions**

520

521

522 One of the most pronounced vulnerabilities to climate events is being a single mother  
523 raising her children. One of our respondents describes the alarming situation she experienced  
524 when she was caught off guard by the rising waters. Her tin-roofed room is located on a part  
525 of the slum built on stilts above a canal. The rainwater arrived both from the clouds and from  
526 the canal, whose water level began to rise suddenly in the evening.

527

528 *R: Everyone went there in the shelter, in our area, there was so much water, only me,*  
529 *my sister and my child were here, my sister told me that: "no one is here, do you want*  
530 *to die?". Then somehow, I catch her and I started swimming, it was not the condition*  
531 *of walking. I started swimming, carrying my child on my shoulder, then my sister even*  
532 *got fallen due to the water pressure. So, I came back to this room. (mother 12)*

533

534 She didn't go in a shelter as others because she perceived it a risk as a single mother without  
535 no other social support. Her brother also stayed in a tin house during the event.

536

537 *R: We were only sitting on the bed, but we were unable to sleep.*

538 *I: Only you and your son?*

539 *R: Yes. Many people went from here, but I didn't go as I don't have any place to go,*  
540 *where I'll go.*

541 *I: During the night water level was increased, you did not do anything?*

542 *R: Where I will go along with a child, so I didn't go outside, I stayed here. I didn't feel*  
543 *good to go any other place with my children, and it was hard for me to go anywhere to*  
544 *take the shelter as a single mother, so that is why I didn't take the risk, I stay here on*  
545 *the bed only. (mother 12)*

546

547 She was also afraid by the current situation of water in the road and her inability to protect her  
548 son from the water.

549 *I: As everyone leaves here, no one asks you to go with them?*

550 *R: Yes, everyone was telling me to go from here, I said no, I'll not go, I had the*  
551 *courage, and I said that, if my death is written here then I'll die here along with my*  
552 *son, I'll not go anywhere.*

553 *I: Why you did not go anywhere?*

554 *R: I didn't go, because I didn't feel good, I had the courage in my mind that nothing*  
555 *will happen, if my death is written here then I'll die here, if I go there, I can also die*  
556 *there. I had the courage in my mind. (mother 12)*

557  
558  
559  
560  
561  
562  
563  
564  
565  
566  
567  
568  
569  
570  
571  
572  
573  
574  
575  
576  
577  
578  
579  
580  
581  
582  
583  
584  
585  
586  
587  
588  
589  
590  
591  
592  
593  
594  
595  
596  
597  
598  
599  
600  
601  
602  
603  
604  
605  
606

Finally, she left her son with her uncle who stayed as the responsible person of the tong houses. Because her son was crying too much in her arms, as she was too stressed by the situation. Consequently, she stayed alone in the room, feeling very anxious, as she constantly thought about her son and found solers in her prayers.

*R: I am million times thankful to Almighty Allah. Later on, the next day, the water level decreased and the rain almost stopped. So, as it was not raining, so I was less tensed. (...) I was so afraid when the water level was increasing, and I was thinking maybe it's going to be the end, but I performed special prayers, and I prayed to Almighty Allah, to save us and also, I was also remembering my Almighty Allah's name again and again, and then I saw in the morning the water level was decreasing. Around 3-4 AM it started less raining, at that time I was like the water level will not increase, and at that time I was having less stress. (mother 12)*

Her initial decision to stay alone in the tin house with her son, awaiting death, is linked to her pre-existing mental condition. This woman has experienced several depressive episodes, including one a few months before the cyclone, which left her bedridden for a month, preventing her from working and taking care of her son, who stayed with his uncle. Her psychological difficulties began during childhood, without her recalling the reason, and then following her marriage and upon discovering that she was her husband's second wife. A few years later, her parents passed away, and her husband died accidentally, causing her pain from the memories of these lost loved ones and in relation to her own condition.

*R: Sometimes I think about my parents, so I feel restless, that time it feels like I'm not able to take a breath, it feels like I'm not breathing, once I got senseless, I was very sick, my sister got to know about it, and she came and she took me to the hospital  
I: apart from your parent's incident, is there anything else that makes you feel restless?*

*R: About my husband, the death of my husband, I think about it a lot, as we stayed together, now he is no more, I can also die, first my parents died, I was living with my parents, they died, then I was living with my husband, but he also died, I can also die. (...) Nowadays I am always thinking about my after-death situation. (mother 12)*

## **Isolated woman**

Another woman, widow who work as maid and live in the tin house explained how she was surprised how the water level raised suddenly and how stressed she was by the situation.

*R: Yes, I was afraid, suddenly waterlogged inside the house and also inside the road, there was no one here, only 3-4 people were here whose stuff was here, I wasn't able to organize anything. (mother 13)*

The respondent was very tensed with exacerbated symptoms due to rumors in the slum about the occurrence of a new cyclone following Sitrang.

*I: Still, you're afraid because of this?*

*R: Yes, people are saying that another cyclone is coming*

607 *I: So, you are feeling afraid?*

608 *R: Yes, I'm feeling afraid. I'm not going to work for 3-4 days. I can't sleep, my body*  
609 *got wet, everything got wet. I got scared of seeing the water level, this is a problem!*  
610 *(mother 13)*

611

612 Another respondent also exhibits symptoms of anxiety and has difficulty sleeping at night due  
613 to the fear of new cyclones. This fear and anticipation of potential disasters can exacerbate  
614 mental health issues, making it difficult for individuals to focus on their daily tasks and  
615 responsibilities.

616

617 *R: Sometimes at midnight, like in the night-time, I feel scared, like maybe suddenly it*  
618 *can come, because I'm staying in the tong house because nowadays people are saying*  
619 *a new one is coming, so that's why I'm afraid if it happened again then what I'll do.*  
620 *(mother 14).*

621

622

## 623 **Pathways of cumulative effects on mental health: a case study**

624

625

626 The following case is that of a woman who represents a typical example of the  
627 cumulative effects of environmental, economic, and negative feedback loops when climate  
628 events occur on the mental health. The negative feedback loop typically intertwines with  
629 economic strategies related to the household size, such as migration and early marriage, or in  
630 some cases, deciding which children will migrate to the city or stay in the village, and  
631 eventually planning to return home.

632

633

### 634 **Trajectory of a woman from the coastal area and feeling trapped in the slum**

635

636 This woman was born in a coastal area of Bangladesh, exposed to risks associated with  
637 climate events such as cyclones, river erosion, and slow-onset events. She belonged to a  
638 family of farmers who owned multiple lands for rice crops and vegetables and had two  
639 houses. During her childhood, she witnessed numerous cyclones and storms. In the early  
640 2000s, a cyclone destroyed one of her family's houses, but no one was injured. She  
641 occasionally suffered from nightmares involving storms destroying everything, especially  
642 when her area was flooded and waterlogged. Since the road was reconstructed and reduced  
643 waterlogging, she no longer suffers from nightmares.

644

645 In the mid-2000s, her family fell into poverty after river erosion destroyed their lands and  
646 houses. With six children, her father decided, for economic reasons, to marry his two older  
647 daughters to men from the capital, hoping for better living conditions. Her older sister moved  
648 to Dhaka and married a man from the slum through her uncle's intervention. Later, her sister  
649 brought her to Dhaka and married her to her husband.

650

651 After her marriage, she discovered that her husband was addicted to marijuana and alcohol,  
652 spending significant amounts of money on drugs. Her husband worked as a rickshaw driver,  
653 earning about 500-600 takas every day. However, he sold his rickshaw six days before our  
654 visit. The couple has many expenses, including education fees for their two children in  
655 primary school (300 takas every month). They live in a semi-built house in the slum near the

656 lake, paying an expensive rent of around 4,000 takas for one room. Food expenses for the  
657 whole family amount to around 10-12,000 takas.

658  
659 Her husband's drug addiction created conflicts within their marriage, and he often physically  
660 abused her. Her mother-in-law, aware of the situation, protected her son, leaving the woman  
661 feeling isolated. The Cyclone Sitrang exacerbated her stress, and she expressed "feeling very  
662 stressed with tension all the time" about her children's future.

663  
664 This case shows how the woman's trajectory has been influenced by climate events, her  
665 family's economic problems, and the decisions made to cope with these challenges, such as  
666 migration and early marriages. Moreover, it highlights how persistent issues, such as poverty,  
667 addiction, and family conflicts, can worsen a woman's mental health situation, especially  
668 when she feels trapped and isolated. This case also demonstrates that women are often the  
669 most affected by the consequences of climate events and economic decisions made within  
670 their households.

671  
672  
673 Other respondents mentioned after the cyclone Sitrang their sadness about leaving a child in  
674 the village as a survival strategy in order to move to the city, only to realize they had fallen  
675 into a dead-end trap. These climatic events reawaken past pains and impact mental health by  
676 highlighting how their strategies have ultimately turned against them.

677  
678 The lack of opportunity impacts all members of these communities, but it appears to be  
679 especially pronounced among women who shoulder caregiving responsibility, have limited  
680 access to education, and occupy the lowest positions within family hierarchies. Both acute and  
681 slow-onset events distinctly affect the mental health of women, mothers, and widows, as it is  
682 influenced by the interplay of socioeconomic factors, social networks, and environmental  
683 conditions. These intersecting factors intensify the vulnerabilities these women experience,  
684 making it even more difficult for them to cope with the consequences of climate-related  
685 events.

686  
687

## 688 Discussion

689  
690

691 Our study presents original findings on how women are disproportionately affected  
692 through two main mechanisms: socioeconomic stressors and acute environmental event.  
693 socioeconomic stressors, particularly during slow-onset environmental transformations,  
694 highlight the intersection between economic and environmental dimensions. Acute events  
695 directly cause psychological distress. In both cases, gender-related social status and roles  
696 shape individual trajectories. We specifically highlight that in these communities, economic  
697 survival strategies are based on the involvement of women in serving the household, which  
698 makes women's health even more vulnerable during climate and environmental events. This  
699 exacerbates gender inequities and jeopardizes their mental health. Furthermore, our study  
700 allows for an analysis of cumulative environmental, economic, and social events by  
701 examining individual trajectories, opening up new perspectives for mental health research in  
702 the Global South. This approach allows us to identify both the structural sociocultural factors  
703 and the individual psychological factors that shape a person's mental health trajectory.

704



705 The specificities of climate events are important to consider for the policy maker and in order  
706 to help the most vulnerable people. Usually the main characteristics retained are the duration,  
707 frequency, intensity of an event, geographical location such as coastal areas [31]. Our results  
708 showed the difference in perception and experiences lived by the most vulnerable for an event  
709 considered as of small-scale by the general authorities. While not of importance for the  
710 general population, it greatly affected both the living and economic conditions of a vulnerable  
711 community and their mental health. It is crucial for decision-makers to anticipate the impacts  
712 based on the topographic vulnerabilities of the sites and the individuals, in order to promote  
713 the establishment of shelters and the provision of material aid, even during less intense events  
714 such as Cyclone Sitrang. This situation is encountered by both men and women; however, it  
715 adds to gender-specific vulnerabilities [32] and should be taken into account to grasp the  
716 cumulative impact of vulnerabilities on individuals' life trajectories.

717  
718 Understanding the gender-specific vulnerabilities related to climate events is important to  
719 address the cumulative impact of vulnerabilities on individuals' life trajectories. Mental health  
720 outcomes linked to SDGs will be difficult to achieve for women if the climate issue is not  
721 taken into account as it disproportionately affects women by reinforcing their vulnerabilities  
722 linked to social structures and producing new gender inequities.

723 More specific studies should be made in the global souths because the indirect impacts of  
724 climate change on mental health are mostly uncovered as it happened mostly in the rural  
725 setting. Yet, these countries are the more vulnerable to climate events even if they are from  
726 far less responsible of the changing climate [33].

727  
728 Our results highlight the importance for future research to consider psychological trajectories  
729 while taking into account health determinants, social factors, as well as environmental factors.  
730 This approach aims to better understand the mechanisms that affect populations and those  
731 shaping their resilience when they face several challenges. Our analysis confirms some other  
732 researcher based in Nigeria during floods in 2011. They found that this event impacted the  
733 childcare of women's activities leading to increased anxiety about the health and safety of  
734 their children [34]. We also find in accordance with the literature various determinants that  
735 affect the link between mental health and climate change among women. Notably, one of the  
736 key factors is the socioeconomic status of women [35], which can exacerbate their  
737 vulnerability to the mental health impacts of climate change. Other determinants include  
738 gender roles and expectations, gendered violence [36], limited access to resources [37] and  
739 services after natural disaster [38], education, and the disproportionate burden of caregiving  
740 responsibilities [36]. These factors can contribute to increased stress, anxiety, psychological  
741 trauma and depression among women when faced with the challenges posed by climate  
742 change [12]. We demonstrate how the combination of factors such as socioeconomic status,  
743 gender roles, limited resources, and caregiving responsibilities can create a complex web of  
744 vulnerabilities that disproportionately affect women's mental health in the face of climate  
745 change. By examining these interconnected factors in detail, we provide a more  
746 comprehensive understanding of the gendered impacts of climate change on mental health in  
747 vulnerable communities, thereby offering valuable insights for future research and policy  
748 interventions. Further research employing a trajectory-based approach is needed to better  
749 understand the interplay of factors and their contributions to the impacts of climate change on  
750 women's mental health in vulnerable communities.

751  
752 Our study has limits. Our interviews were conducted in Bengali and transcribed so we might  
753 have lost a part of the information. However, the analysis was performed with the translator to  
754 overcome this risk. Our data were collected on a two-period basis, while this topic is a

755 sensitive one and might need iterative interviews to build a greater trust from the respondents.  
756 We tried to overcome this limit by triangulating within the same household and meeting  
757 multiple time with our respondents to build a trusting relationship.  
758 We were perceived as foreigners and outsiders which might have had an impact on the quality  
759 of data. In both setting we have been associated to their survival economical strategies and the  
760 interviews could have been biased to meet the respondent needs. The tools from the reflexive  
761 ethnography have help us to analyze our position in each situation and how it has shaped the  
762 data.

763  
764

## 765 **Conclusion**

766  
767

768 It is crucial to consider the specific mental health impacts of climate change on  
769 vulnerable groups, such as women, mothers, and widows, particularly in rural areas where  
770 resources and support may be limited. Providing access to mental health care, financial  
771 assistance, and climate-resilient livelihoods can help alleviate the strain on these individuals  
772 and improve their overall well-being.

773 Addressing the specific needs and vulnerabilities of women in the context of climate change  
774 requires a multi-faceted approach that includes promoting gender equality, empowering  
775 women to make informed decisions about their lives, and providing access to resources and  
776 support networks that can help them build resilience and cope with the challenges they face.  
777 Additionally, it is crucial to engage communities and stakeholders in the process of  
778 challenging and changing harmful gender norms and expectations that contribute to the  
779 vulnerability of women in the face of climate change.

780  
781

## 782 **Acknowledgments**

783  
784

785 The authors acknowledge those who supported this work at various phases of our project and  
786 specifically all the participants on the two settings.

787  
788

## 789 **References**

790  
791

792 1. Berry HL, Bowen K, Kjellstrom T. Climate change and mental health: a causal pathways  
793 framework. *Int J Public Health* [Internet]. 2010 Apr 1 [cited 2021 Apr 6];55(2):123–32.  
794 Available from: <https://doi.org/10.1007/s00038-009-0112-0>

795 2. Ramadan AMH, Ataallah AG. Are climate change and mental health correlated? *Gen*  
796 *Psychiatr* [Internet]. 2021 Nov 9 [cited 2022 Jan 16];34(6):e100648. Available from:  
797 <https://www.ncbi.nlm.nih.gov/pmc/articles/PMC8578975/>

798 3. OBrien LV, Berry HL, Coleman C, Hanigan IC. Drought as a mental health exposure.  
799 *Environmental Research* [Internet]. 2014 May 1 [cited 2022 Oct 12];131:181–7.  
800 Available from: <https://www.sciencedirect.com/science/article/pii/S0013935114000607>

- 801 4. FAO. The White/Wiphala Paper on Indigenous Peoples' Food Systems. Roma: FAO;  
802 2021.
- 803 5. Sultana F. Suffering for water, suffering from water: Emotional geographies of resource  
804 access, control and conflict. *Geoforum* [Internet]. 2011 Mar [cited 2022 Aug  
805 8];42(2):163–72. Available from:  
806 <https://linkinghub.elsevier.com/retrieve/pii/S0016718510001442>
- 807 6. Change, IPCC Climate. Climate change and food security: risks and responses. 2014 p.  
808 122. Report No.: 1132.
- 809 7. Ayeb-Karlsson S, van der Geest K, Ahmed I, Huq S, Warner K. A people-centred  
810 perspective on climate change, environmental stress, and livelihood resilience in  
811 Bangladesh. *Sustain Sci* [Internet]. 2016 Jul 1 [cited 2022 Feb 22];11(4):679–94.  
812 Available from: <https://doi.org/10.1007/s11625-016-0379-z>
- 813 8. Stojanov R, Kelman I, Shen S, Duží B, Upadhyay H, Lingaraj GJ, et al. Contextualising  
814 typologies of environmentally induced population movement. *Disaster Prevention and  
815 Management* [Internet]. 2014 Oct 28 [cited 2023 May 3];23(5):508–23. Available from:  
816 <http://dx.doi.org/10.1108/DPM-09-2013-0152>
- 817 9. Dapilah F, Nielsen JØ, Friis C. The role of social networks in building adaptive capacity  
818 and resilience to climate change: a case study from northern Ghana. *Climate and  
819 Development* [Internet]. 2020 Jan 2 [cited 2023 May 14];12(1):42–56. Available from:  
820 <https://doi.org/10.1080/17565529.2019.1596063>
- 821 10. Denckla C, Koenen K, Kubzansky Lee Kum Kee L. Climate change and mental health:  
822 Developing a framework for interdisciplinary investigation [Internet]. Radcliffe Institute  
823 for Advanced Study at Harvard University. 2020 [cited 2022 Aug 5]. Available from:  
824 [https://www.radcliffe.harvard.edu/opportunities-for-researchers/2021-exploratory-  
825 seminars/climate-change-and-mental-health-interdisciplinary-investigation](https://www.radcliffe.harvard.edu/opportunities-for-researchers/2021-exploratory-seminars/climate-change-and-mental-health-interdisciplinary-investigation)
- 826 11. Siegele L. Loss and damage: The theme of slow onset impact. *Loss & Damage in  
827 Vulnerable Countries Initiative, Climate Development Knowledge Network*. 2012;
- 828 12. Gender G, Alliance C. Gender and climate change: A closer look at existing evidence.  
829 New-York, USA: Global Gender and Climate Alliance: New York, NY, USA; 2016.
- 830 13. Neumayer E, Plümper T. The Gendered Nature of Natural Disasters: The Impact of  
831 Catastrophic Events on the Gender Gap in Life Expectancy, 1981–2002. *Annals of the  
832 Association of American Geographers* [Internet]. 2007 [cited 2023 May 16];97(3):551–  
833 66. Available from: <https://doi.org/10.1111/j.1467-8306.2007.00563.x>
- 834 14. Pearse R. Gender and climate change. *WIREs Climate Change* [Internet]. 2017 [cited  
835 2023 May 16];8(2):e451. Available from:  
836 <https://onlinelibrary.wiley.com/doi/abs/10.1002/wcc.451>
- 837 15. Dayrell C. Gender inequality. *Nat Clim Chang* [Internet]. 2022 Apr [cited 2023 May  
838 8];12(4):313–313. Available from: <https://www.nature.com/articles/s41558-022-01347-z>
- 839 16. Eckstein D, Künzel V, Schäfer L, Wings M. Global climate risk index 2020. Bonn:  
840 Germanwatch. 2019;

- 841 17. Dastagir MR. Modeling recent climate change induced extreme events in Bangladesh: A  
842 review. *Weather and Climate Extremes* [Internet]. 2015 Mar 1 [cited 2023 May  
843 15];7:49–60. Available from:  
844 <https://www.sciencedirect.com/science/article/pii/S2212094714000826>
- 845 18. Ahsan S, Ali MS, Hoque MR, Osman MS, Rahman M, Babar MJ, et al. Agricultural and  
846 Environmental Changes in Bangladesh in Response to Global Warming. In: Lal R,  
847 Sivakumar MVK, Faiz SMA, Mustafizur Rahman AHM, Islam KR, editors. *Climate  
848 Change and Food Security in South Asia* [Internet]. Dordrecht: Springer Netherlands;  
849 2011 [cited 2023 Feb 12]. p. 119–34. Available from: [https://doi.org/10.1007/978-90-  
850 481-9516-9\\_9](https://doi.org/10.1007/978-90-481-9516-9_9)
- 851 19. Brammer H. *Climate change, sea-level rise and development in Bangladesh* [Internet].  
852 University Press; 2014 [cited 2022 Apr 13]. Available from:  
853 [https://scholar.google.com/scholar\\_lookup?title=Climate+change%2C+sea-  
854 level+rise+and+development+in+Bangladesh&author=Brammer%2C+H.&publication\\_  
855 year=2014](https://scholar.google.com/scholar_lookup?title=Climate+change%2C+sea-level+rise+and+development+in+Bangladesh&author=Brammer%2C+H.&publication_year=2014)
- 856 20. Khan MR, Huq S, Risha AN, Alam SS. High-density population and displacement in  
857 Bangladesh. *Science* [Internet]. 2021 Jun 18 [cited 2023 Feb 12];372(6548):1290–3.  
858 Available from: <https://www.science.org/doi/10.1126/science.abi6364>
- 859 21. National Institute of Mental Health. *National Mental Health Survey of Bangladesh  
860 2018–19: Provisional Fact Sheet* [Internet]. Dhaka, Bangladesh: NMIH; 2019 p. 4.  
861 Available from: [https://www.who.int/docs/default-source/searo/bangladesh/pdf-  
862 reports/cat-2/nimh-fact-sheet-5-11-19.pdf?sfvrsn=3e62d4b0\\_2](https://www.who.int/docs/default-source/searo/bangladesh/pdf-reports/cat-2/nimh-fact-sheet-5-11-19.pdf?sfvrsn=3e62d4b0_2)
- 863 22. Sparling TM, Waid JL, Wendt AS, Gabrysch S. Depression among women of  
864 reproductive age in rural Bangladesh is linked to food security, diets and nutrition.  
865 *Public Health Nutr* [Internet]. 2020 [cited 2023 Feb 12];23(4):660–73. Available from:  
866 <https://www.ncbi.nlm.nih.gov/pmc/articles/PMC7058425/>
- 867 23. WHO. Bangladesh. WHO Special Initiative for Mental Health. *Situational Assessment*  
868 [Internet]. Geneva, Switzerland: WHO; 2020 p. 11. Available from:  
869 [https://cdn.who.int/media/docs/default-source/mental-health/special-initiative/who-  
870 special-initiative-country-report---bangladesh---2020\\_f746e0ca-8099-4d00-b126-  
871 fa338a06ca6e.pdf?sfvrsn=c2122a0e\\_7](https://cdn.who.int/media/docs/default-source/mental-health/special-initiative/who-special-initiative-country-report---bangladesh---2020_f746e0ca-8099-4d00-b126-fa338a06ca6e.pdf?sfvrsn=c2122a0e_7)
- 872 24. Hasan MT, Anwar T, Christopher E, Hossain S, Hossain MM, Koly KN, et al. The  
873 current state of mental healthcare in Bangladesh: part 2 – setting priorities. *BJPsych Int*  
874 [Internet]. [cited 2023 May 15];18(4):82–5. Available from:  
875 <https://www.ncbi.nlm.nih.gov/pmc/articles/PMC8554892/>
- 876 25. Weber F. Settings, interactions and things. *Ethnography*. 2001;24:484–9.
- 877 26. Clech L, Meister S, Belloiseau M, Benmarhnia T, Bonnet E, Casseus A, et al. Healthcare  
878 system resilience in Bangladesh and Haiti in times of global changes (climate-related  
879 events, migration and Covid-19): an interdisciplinary mixed method research protocol.  
880 *BMC Health Serv Res*. 2022 Mar 15;22(1):340.

- 881 27. World Health Organization. Social determinants of mental health [Internet]. Geneva:  
882 World Health Organization; 2014 [cited 2022 Aug 30]. 52 p. Available from:  
883 <https://apps.who.int/iris/handle/10665/112828>
- 884 28. Lund C, Brooke-Sumner C, Baingana F, Baron EC, Breuer E, Chandra P, et al. Social  
885 determinants of mental disorders and the Sustainable Development Goals: a systematic  
886 review of reviews. *The Lancet Psychiatry* [Internet]. 2018 Apr [cited 2022 Aug  
887 30];5(4):357–69. Available from:  
888 <https://linkinghub.elsevier.com/retrieve/pii/S2215036618300609>
- 889 29. Morgan R, George A, Ssali S, Hawkins K, Molyneux S, Theobald S. How to do (or not  
890 to do)... gender analysis in health systems research. *Health Policy Plan*. 2016  
891 Oct;31(8):1069–78.
- 892 30. Bates LM, Schuler SR, Islam F, Islam MdK. Socioeconomic Factors and Processes  
893 Associated with Domestic Violence in Rural Bangladesh. *International Family Planning*  
894 *Perspectives* [Internet]. 2004 [cited 2023 May 16];30(4):190–9. Available from:  
895 <https://www.jstor.org/stable/1566493>
- 896 31. Seneviratne S, Nicholls N, Easterling D, Goodess C, Kanae S, Kossin J, et al. Changes  
897 in climate extremes and their impacts on the natural physical environment. 2012 [cited  
898 2023 May 8];109–230. Available from: <https://doi.org/10.7916/d8-6nbt-s431>
- 899 32. Ayeb-Karlsson S. ‘I do not like her going to the shelter’: Stories on gendered disaster  
900 (im)mobility and wellbeing loss in coastal Bangladesh. *International Journal of Disaster*  
901 *Risk Reduction* [Internet]. 2020 Nov 1 [cited 2022 Aug 12];50:101904. Available from:  
902 <https://www.sciencedirect.com/science/article/pii/S2212420920314060>
- 903 33. Schlosberg D, Collins LB. From environmental to climate justice: climate change and  
904 the discourse of environmental justice. *WIREs Climate Change* [Internet]. 2014 [cited  
905 2023 May 8];5(3):359–74. Available from:  
906 <https://onlinelibrary.wiley.com/doi/abs/10.1002/wcc.275>
- 907 34. Ajibade I, McBean G, Bezner-Kerr R. Urban flooding in Lagos, Nigeria: Patterns of  
908 vulnerability and resilience among women. *Global Environmental Change* [Internet].  
909 2013 Dec 1 [cited 2023 May 8];23(6):1714–25. Available from:  
910 <https://www.sciencedirect.com/science/article/pii/S0959378013001441>
- 911 35. Rothschild J, Haase E. Women’s mental health and climate change Part II:  
912 Socioeconomic stresses of climate change and eco-anxiety for women and their children.  
913 *International Journal of Gynecology & Obstetrics* [Internet]. 2023 [cited 2023 Feb  
914 10];160(2):414–20. Available from:  
915 <https://onlinelibrary.wiley.com/doi/abs/10.1002/ijgo.14514>
- 916 36. Stone K, Blinn N, Spencer R. Mental Health Impacts of Climate Change on Women: a  
917 Scoping Review. *Curr Envir Health Rpt* [Internet]. 2022 Jun 1 [cited 2023 Feb  
918 10];9(2):228–43. Available from: <https://doi.org/10.1007/s40572-022-00346-8>
- 919 37. Beaumier MC, Ford JD. Food insecurity among Inuit women exacerbated by  
920 socioeconomic stresses and climate change. *Can J Public Health*. 2010;101(3):196–201.

- 921 38. Nahar N, Blomstedt Y, Wu B, Kandarina I, Trisnantoro L, Kinsman J. Increasing the  
922 provision of mental health care for vulnerable, disaster-affected people in Bangladesh.  
923 BMC Public Health [Internet]. 2014 Jul 10 [cited 2022 Jan 17];14(1):708. Available  
924 from: <https://doi.org/10.1186/1471-2458-14-708>

925
